# Supplementary material for: The evolution of alternative splicing in glioblastoma under therapy
Source: Genome Biol. 2021 Jan 26;22:48. doi: 10.1186/s13059-021-02259-5 (PMC7835670; doi:10.1186/s13059-021-02259-5)
Supplement: Supplementary file 2 — Additional file 2: Table S2. PCA loadings of AS events described in Fig. 1. [file 13059_2021_2259_MOESM2_ESM.pdf]

### **Supplementary Figures:**

Fig. S1: Examples of tumor-specific AS events in genes associated with GBM malignant progression.

Fig. S2: A) Putative neojunctions derived from Kahles et al. [2], validated in 10X Genomics scRNA-seq of neoplastic cells. B) The distribution of tumor-specific neojunctions, derived from analysis of in-house data, compared between primary and recurrent GBM.

Fig. S3: A) Examples of AS events enriched in recurrent-GBM. B) The frequencies of expression of neojunction sequences supporting the inclusion of exon 19 in scRNA-seq of neoplastic cells from human GBMs via the 10X Genomics platform.

FN1

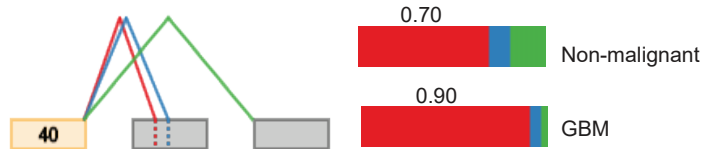

STAT1

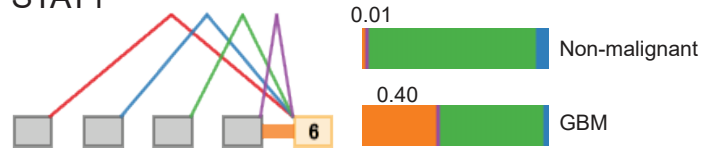

FOS

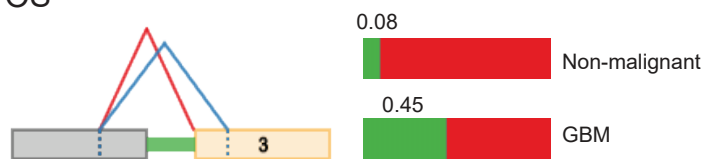

STAT3

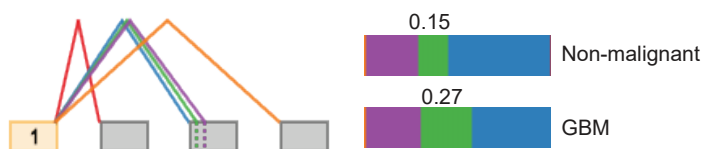

MAPK9

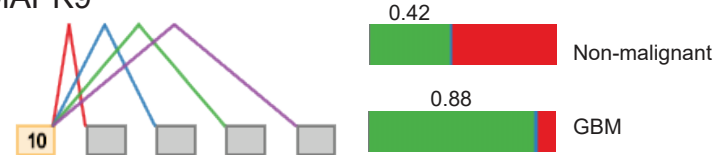

STAT3

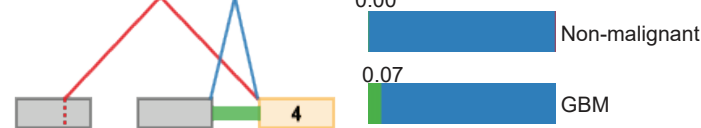

TGFB1

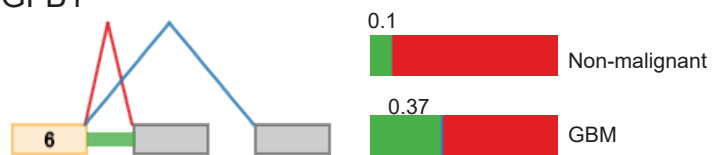

STAT3

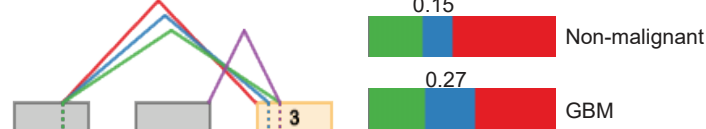

NFKB1

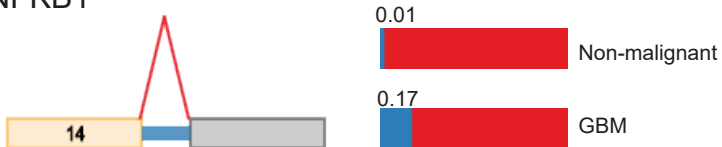

PIK3R1

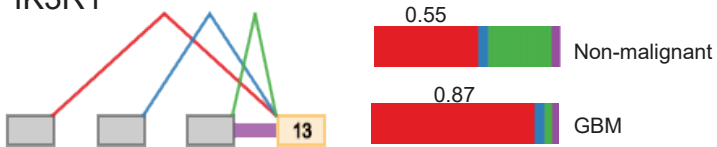

RELA

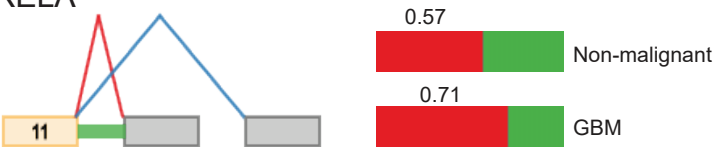

STAT1

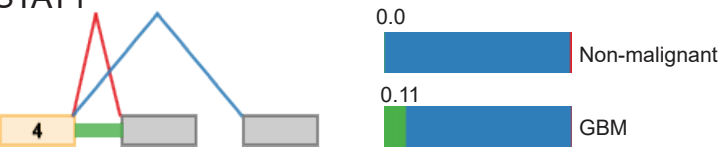

Fig S1

A

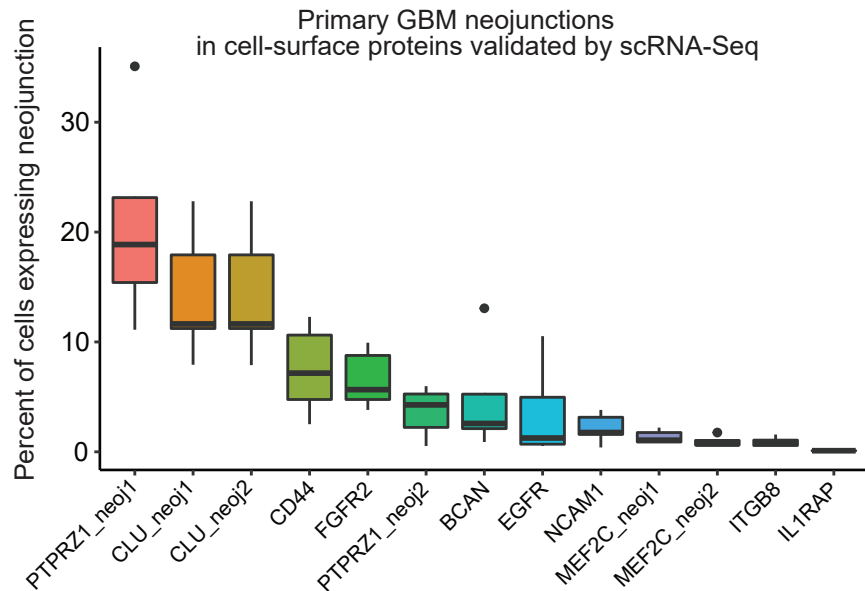

B

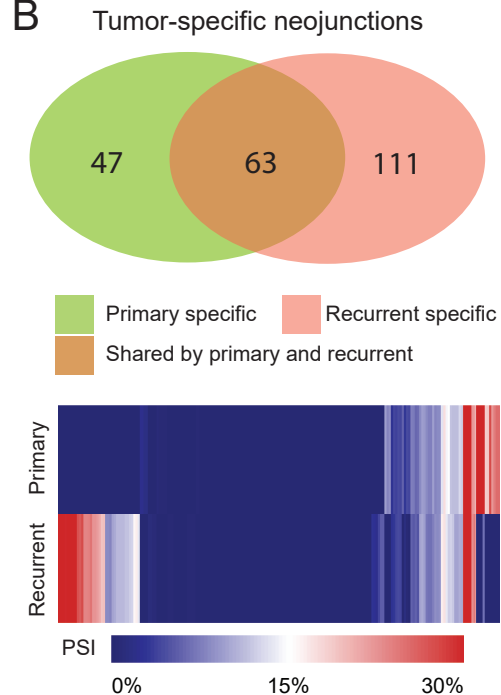

Fig S2

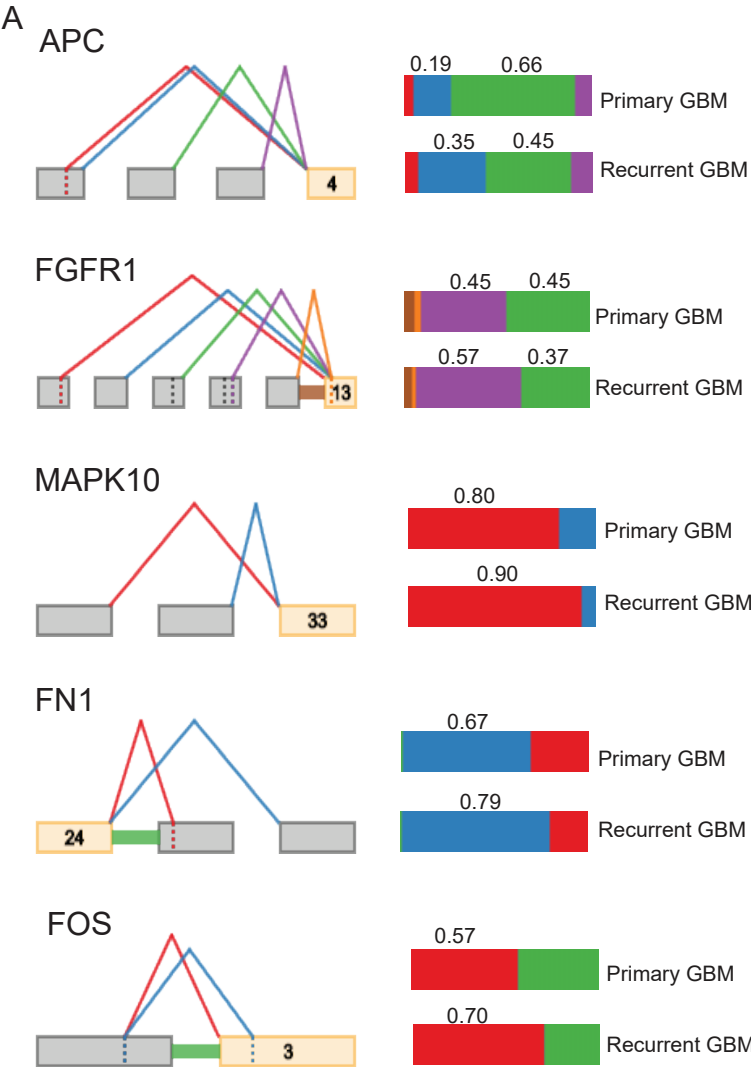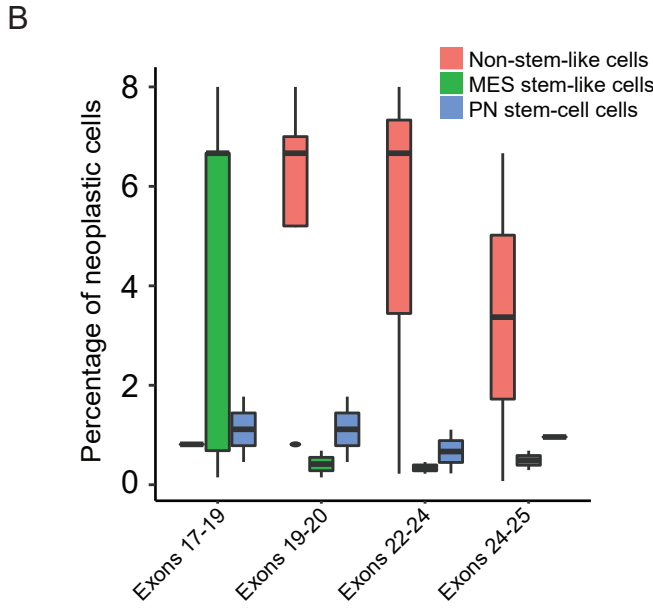

Fig S3
